# Supplementary material for: Ionic liquid-based fluorescence sensing paper: rapid, ultrasensitive, and in-site detection of methamphetamine in human urine
Source: Royal Society of Chemistry journal article supplement (doi:10.1039/c6ra08193b), 2016-01-01
Supplement: c6ra08193b1.pdf [file c6ra08193b1.pdf]

# **Ionic Liquid-Based Fluorescent Sensing Paper: Rapid, Ultrasensitive, and In-site Detection of Methamphetamine in Human Urine**

## ***Electronic Supplementary Information***

Ruifeng Wang,<sup>a,b,c</sup> Xiujuan Qi,<sup>a</sup> Shimin Liu,<sup>a</sup> Lei Zhao,<sup>c</sup> Liujin Lu<sup>a</sup> and Youquan Deng<sup>a,\*</sup>

---

<sup>a</sup> Centre for Green Chemistry and Catalysis, State Key Laboratory of Solid Lubrication, Lanzhou Institute of Chemical Physics, Chinese Academy of Sciences, No. 18, Tianshui Middle Road, Lanzhou, P. R. China. E-mail: ydeng@licp.cas.cn; Tel: +86-931-4968116.

<sup>b</sup> University of Chinese Academy of Sciences, Beijing, 100049, China.

<sup>c</sup> Public Security Bureau of Ordos, The Inner Mongolia Autonomous Region, 017000, China.

## **ESI1: Experimental**

### **1.1 Reagent and chemicals**

MA-HCl was obtained from Institution of Forensic Science, the Criminal Department of Ordos Public Security Bureau. Ionic liquids were synthesized in our lab. HPLC-grade methanol and acetonitrile were obtained from Tianjin YongDa Chemical Reagent Development Center (Tianjin, China). 1M Sodium hydroxide was used to adjust the pH values of aqueous solutions. Ultrapure water was used for the preparation of mobile phase and sample solution.

The stock solution (0.1 mg mL<sup>-1</sup>) of MA-HCl was prepared in ultrapure water and stored at 4 °C before use. Then the aqueous samples solutions were prepared daily by diluting the stock solution with ultrapure water.

### **1.2 Instrument**

An Agilent 1100 liquid chromatograph equipped with a UV was used. An Agilent ZORBAX SB-C18 column (4.6×250 mm, 5 mm particle size) was employed for the separation at 30 °C. The

mobile phase was obtained with acetonitrile/30 mmol L<sup>-1</sup> ammonium acetate (15:85, v/v) at 1 mL min<sup>-1</sup>, the injection volume was 20 µL and detection wavelength was 217 nm.

### 1.3 Sample

Drug-free human urine samples were collected from a healthy volunteer and stored below 0 °C. The real human urine sample of MA abuser was provided by Ordos Public Security Bureau for application of the testing paper. Working solutions at 5000 ng mL<sup>-1</sup> were freshly prepared by appropriate dilution of the stock solution with ultrapure water.

### 1.4 extraction procedure

The liquid-liquid extraction was performed according to the following procedures: (1) 10.0 mL ultrapure water spiked with methamphetamine was put into a 15 mL centrifugal tube, and subsequently 0.5 mL ionic liquids was introduced to the sample solution and shaking 15 s; (2) the solution was centrifuged for 10 min at 7000 rpm; (3) 20 µL of the water phase was injected into HPLC for analysis.

### ESI2: The solubility of DNC in water(left) and BPyNTf<sub>2</sub>(right)

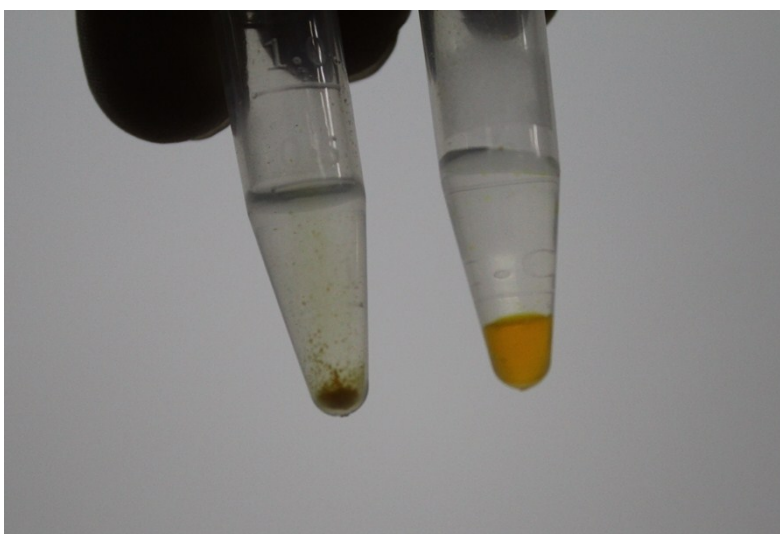

**ESI3: The comparative test between ILBF-sp and IMCG-tp (from market)  
under a portable UV lamp**

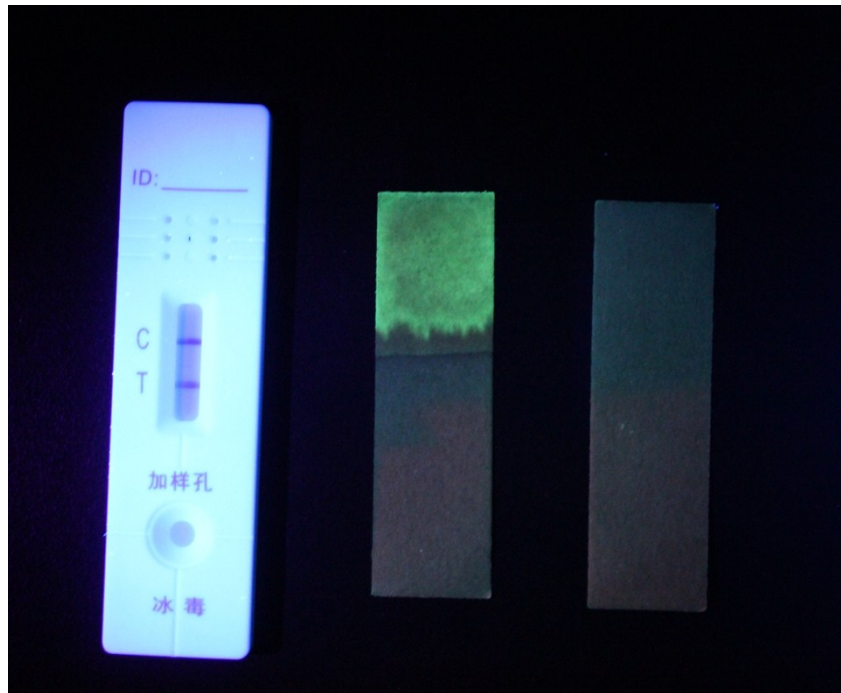

Urine (60  $\mu$ L, from an “ice” addict) was dropped on IMCG-tp and ILBF-sp was dipped in the urine sample, respectively. ILBF-sp (middle) showed positive with a strong fluorescent signal, the IMCG-tp (left) showed negative. A blank ILBF-sp (right) was severed as the reference.

**ESI4: The controlled experiment to test the detection selectivity of ILBF-sp under a portable UV lamp**

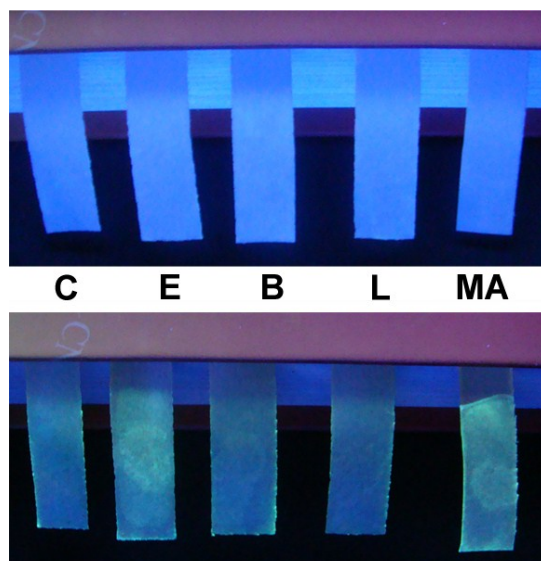

C, E, P, and L stood for chlorpheniramine, ephedrine, phenobarbital, and lorazepam, respectively. MA stood for methamphetamine served as the reference.

Upper photo: blank filter papers were dipped in the ultrapure water solutions of these medicines at  $100 \text{ ng mL}^{-1}$ . The results showed that these medicines could not generate fluorescence signal by themselves under UV light.

Bottom photo: ILBF-sp were dipped in the ultrapure water solutions of these medicines at  $100 \text{ ng mL}^{-1}$ . The results showed that no obvious fluorescence could be seen for chlorpheniramine, phenobarbital, and lorazepam except ephedrine, referencing to methamphetamine.
